# Supplementary material
Source: publisher figshare collection journal article supplement (https://sage.figshare.com/ndownloader/files/15254669)
Supplement: Supplementary file 1 [file 15254669]

Supplementary Table 2. Untransformed hospital cost and length of stay comparisons

| Palliative care (referent) | Hospital cost (\$) |          | Hospital length of stay (days) |          |
|----------------------------|--------------------|----------|--------------------------------|----------|
|                            | Estimate           | <i>P</i> | Estimate                       | <i>P</i> |
| Systemic procedures        | 31,092.06          | < .001   | 6.34                           | < .001   |
| Local procedures           | 49,810.77          | < .001   | 7.19                           | < .001   |
| Surgeries                  | 44,031.19          | < .001   | 6.81                           | < .001   |
